# Supplementary material
Source: publisher figshare collection journal article supplement (https://karger.figshare.com/articles/dataset/_/7447982)
Supplement: Supplementary file 1 [file 1]

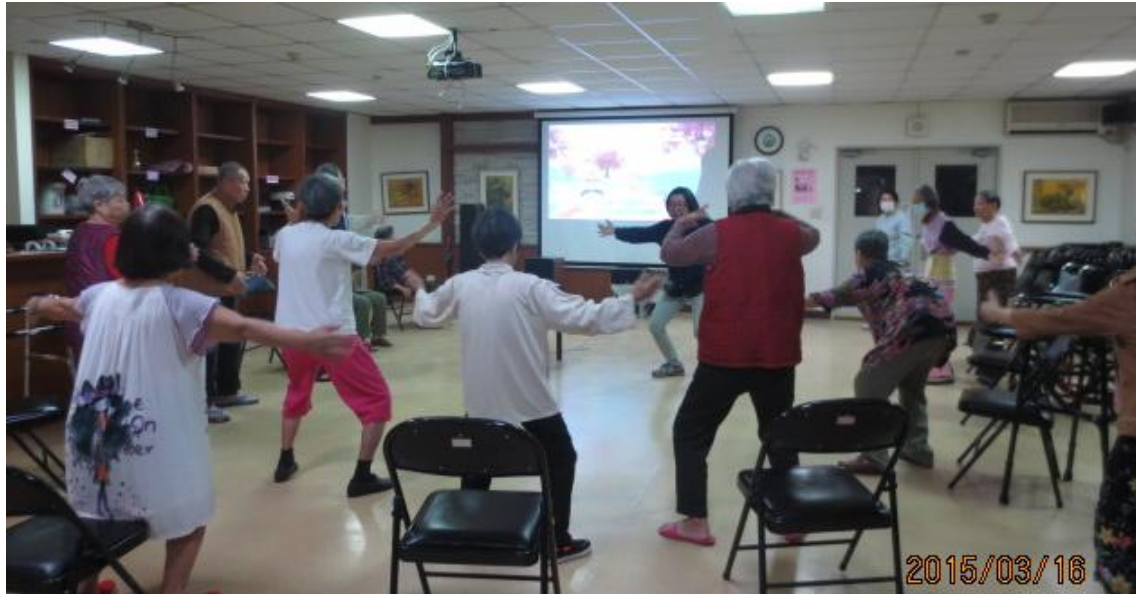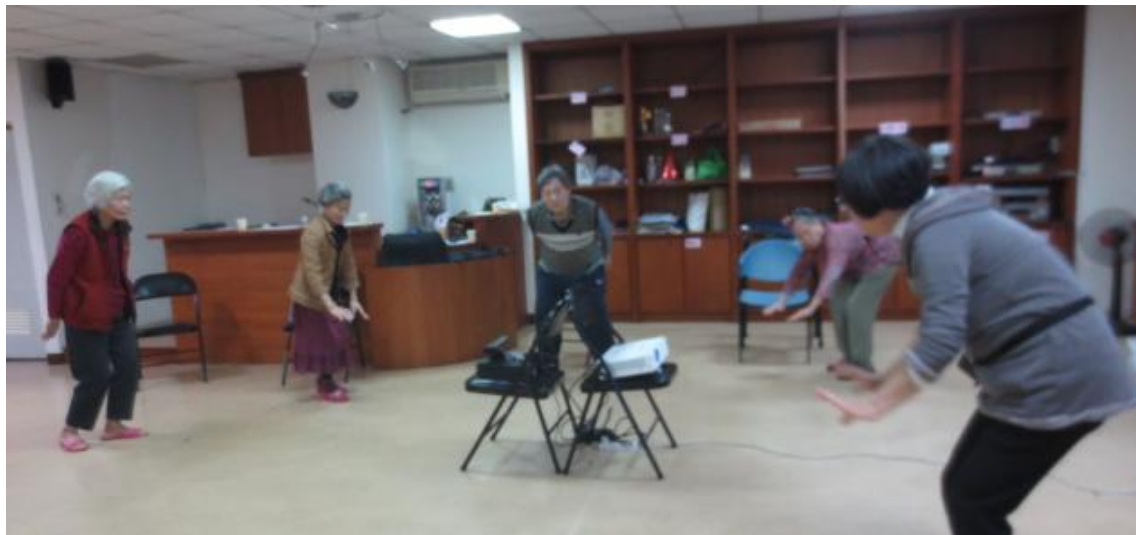

### Supplementary Figure 1

A Kinect sensor device captured the motion of one elder, and the image was projected onto the screen. Other elders stood around the instructor and exercised together.
