# Supplementary material
Source: publisher figshare collection journal article supplement (https://karger.figshare.com/articles/dataset/_/7447982)
Supplement: Supplementary file 2 [file 1]

## Supplementary Figure 2

1.

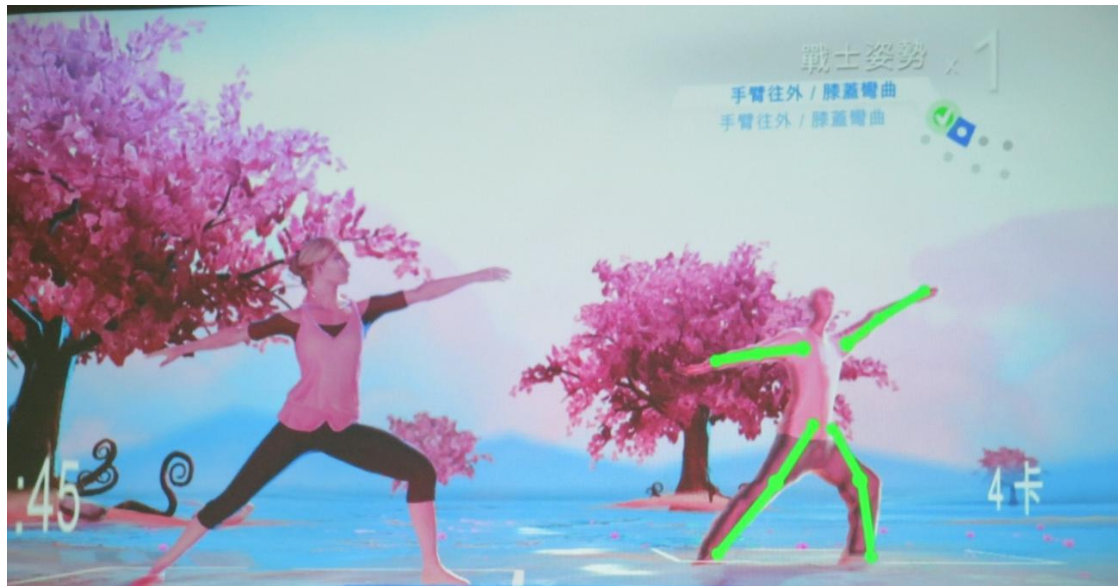

On the screen, the player must follow the movements of a virtual coach on the left, and can see himself in the right. The player can see his/her bone align (green line) and check condition for his/her each body section.

2.

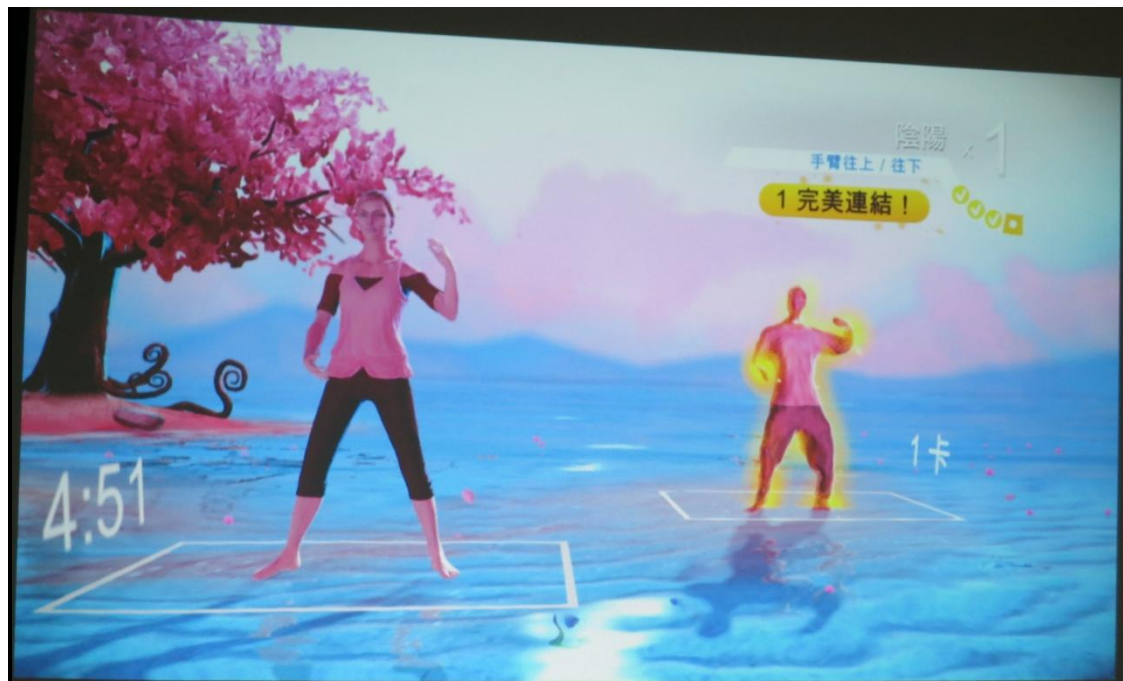

When doing the right motion exactly, the player become bright.

3.

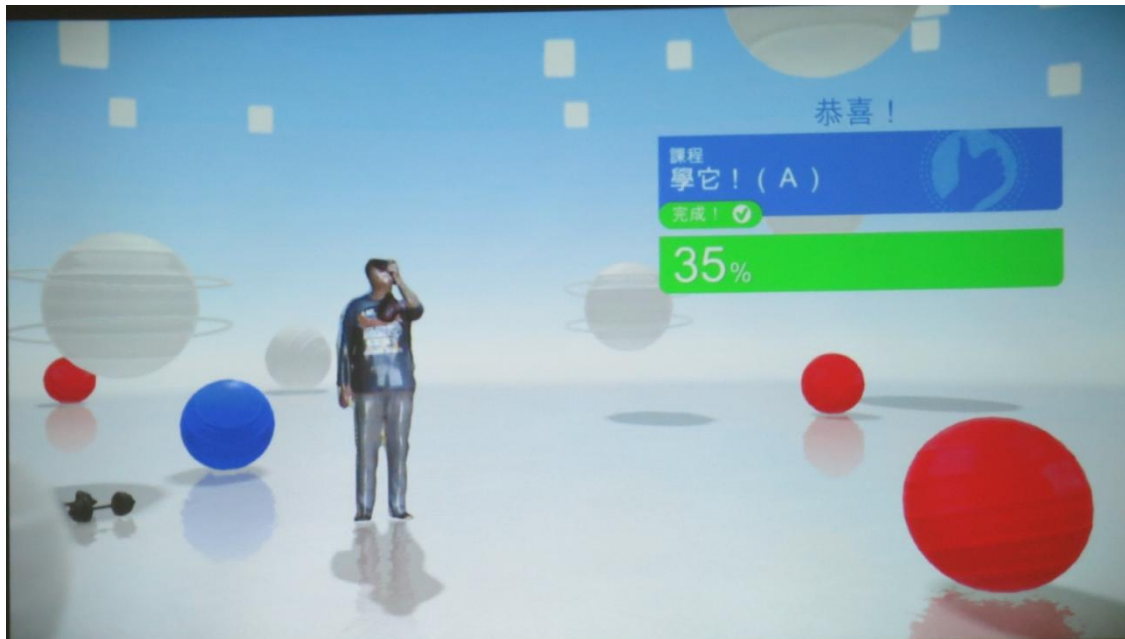

When the activity finished, the accuracy movement of this participant was shown on the screen (for example: 35%).
