# Supplementary material
Source: publisher figshare collection journal article supplement (https://karger.figshare.com/articles/dataset/_/7447982)
Supplement: Supplementary file 3 [file 1]

Archive with 4 entries (4 files):
- DEM_201805014_0_2_supplemental_Table_1.docx
- DEM_201805014_0_3_supplemental_Table_2.docx
- DEM_201805014_0_7_supplemental_figure_1.pdf
- DEM_201805014_0_8_supplemental_figure_2.pdf
