# Supplementary material
Source: publisher figshare collection journal article supplement (https://karger.figshare.com/articles/dataset/_/7447982)
Supplement: Supplementary file 3 [file 1 › DEM_201805014_0_2_supplemental_Table_1.docx]

**Supplementary Table 1.** **Kinect TC exercise schedule**

| **Week** | **Activities** |
| --- | --- |
| 1 | Introductory Session (say hello, explanation of the exercise)  Learn the movements of Section 1 - Learn It (A) |
| 2 | Learn the movements of Section 2 - Learn It (A), and review movements learned previously |
| 3 | Learn the movements of Section 2 - Learn It (B), and review movements learned previously |
| 4 | Learn the movements of Section 1 - Learn It (B), and review movements learned previously |
| 5-28 | Warm-up exercise 10 minutes |
| Chose "Learn It" activity in former weeks, and then change to "Develop It" when the participants' movement were familiar.  After 16 weeks, mostly participants were skilled and can chose "Master It".  Activities were played until accumulate 45 minutes. |
| Cool-down exercise 5 minutes |

Note: week 1 to 4 were familiarization phase.

Because the movements of Section 1 - Learn It (B) contain more balance challenge, such as single leg standing, we arrange the activity in the final.
