# Supplementary material
Source: publisher figshare collection journal article supplement (https://karger.figshare.com/articles/dataset/_/7447982)
Supplement: Supplementary file 3 [file 1 › DEM_201805014_0_3_supplemental_Table_2.docx]

**Supplementary Table 2.**

Baseline Characteristics of Participants Who Dropped Out within Intervention Period and Those Who Participated in Post-intervention Assessment (Month 6)

| **Characteristics** | | **Dropped out (n=9)** | **Participated in post-intervention assessment (n=51)** | ***p* value** |
| --- | --- | --- | --- | --- |
| **Sociodemographic data** | | | | |
|  | Age, mean±SD | 76.3±7.8 | 78.5±7.7 | 0.447 |
|  | Female, n (%) | 8 (88.9) | 35 (68.6) | 0.400a |
|  | Education ≦6 years, n (%) | 5 (55.6) | 37 (72.5) | 0.528a |
| **Health-related factors** | | | | |
|  | CCI, mean±SD | 1.3±0.5 | 1.0±0.9 | 0.272 |
|  | 17<MMSE<26 (mild) , n (%) | 6 (66.7) | 36 (70.6) | 1.000a |
| **Outcome measures (physical function),** mean±SD | | | | |
|  | 6MWT, m | 263.2±75.1 | 267.9±133.3 | 0.918 |
|  | 30sSTS, times | 9.1±2.4 | 9.9±3.1 | 0.489 |
|  | 30sAC, times | 10.6±4.6 | 12.6±5.3 | 0.290 |
|  | TUG | 16.8±4.8 | 17.5±10.2 | 0.834 |
|  | FR cm | 19.3±6.6 | 18.1±9.0 | 0.712 |
|  | Sit-and-reach, cm | 4.5±6.2 | -2.4±10.6 | 0.065 |
|  | Drop ruler test, cm | 49.9±13.8 | 39.3±10.2 | 0.009* |
|  | 5M gait speed, seconds | 6.0±1.6 | 8.4±5.7 | 0.206 |
| **Outcome measures (cognitive function)**, mean±SD | | | | |
|  | LTM | 7.9±2.4 | 7.7±3.0 | 0.878 |
|  | STM | 5.3±2.5 | 6.1±3.5 | 0.547 |
|  | ATTEN | 6.8±1.1 | 6.1±1.3 | 0.159 |
|  | MENMA | 4.1±3.6 | 4.2±3.2 | 0.814 |
|  | ORIEN | 9.4±5.2 | 10.4±5.6 | 0.651 |
|  | ABSTR | 6.7±2.0 | 7.4±1.9 | 0.320 |
|  | LANG | 8.3±1.6 | 8.3±1.8 | 1.000 |
|  | DRAW | 6.8±2.5 | 6.7±3.6 | 0.942 |
|  | ANML | 4.0±2.8 | 4.1±2.3 | 0.872 |
|  | CASI | 59.3±17.1 | 61.2±19.5 | 0.785 |
| **Outcome measures (other factors)**, mean±SD | | | | |
|  | GDS | 2.6±3.0 | 2.0±2.2 | 0.550 |

*Note*: CCI = Charlson Comorbidity Index; MMSE = Mini-Mental State Examination; 6MWT = Six Minute Walk test; 30s STS = 30-second sit to stand test; 30sAC = arm curl test; TUG = Timed Up and Go test; FR = Functional Reach test; 5M = five meters; LTM = long-term memory; STM = short-term memory; ATTEN = attention; MENMA = mental manipulation; ORIEN = orientation; ABSTR = abstract thinking and judgment; LANG = language; DRAW = drawing; ANML = animal-name fluency; CASI = Cognitive Abilities Screening Instrument; GDS = Geriatric Depression Scale.

aYates continuity correction

**p*<0.05
